# Supplementary material
Source: PubMed Central journal article supplement (PMC4855920)
Supplement: JCI81516.sd.pdf [file JCI81516.sd.pdf]

**Supplementary Material**

**Transactivation of *Syt11/Slp1* by  
Meis1 promotes CXCL12/CXCR4 signaling and myeloid  
leukemogenesis *in vivo***

**Takashi Yokoyama, Mayuka Nakatake, Takeshi Kuwata, Arnaud  
Couzinet, Ryo Goitsuka, Shuichi Tsutsumi, Hiroyuki Aburatani,  
Peter J.M. Valk, Ruud Delwel, and Takuro Nakamura**

**Ten Supplemental Figures**

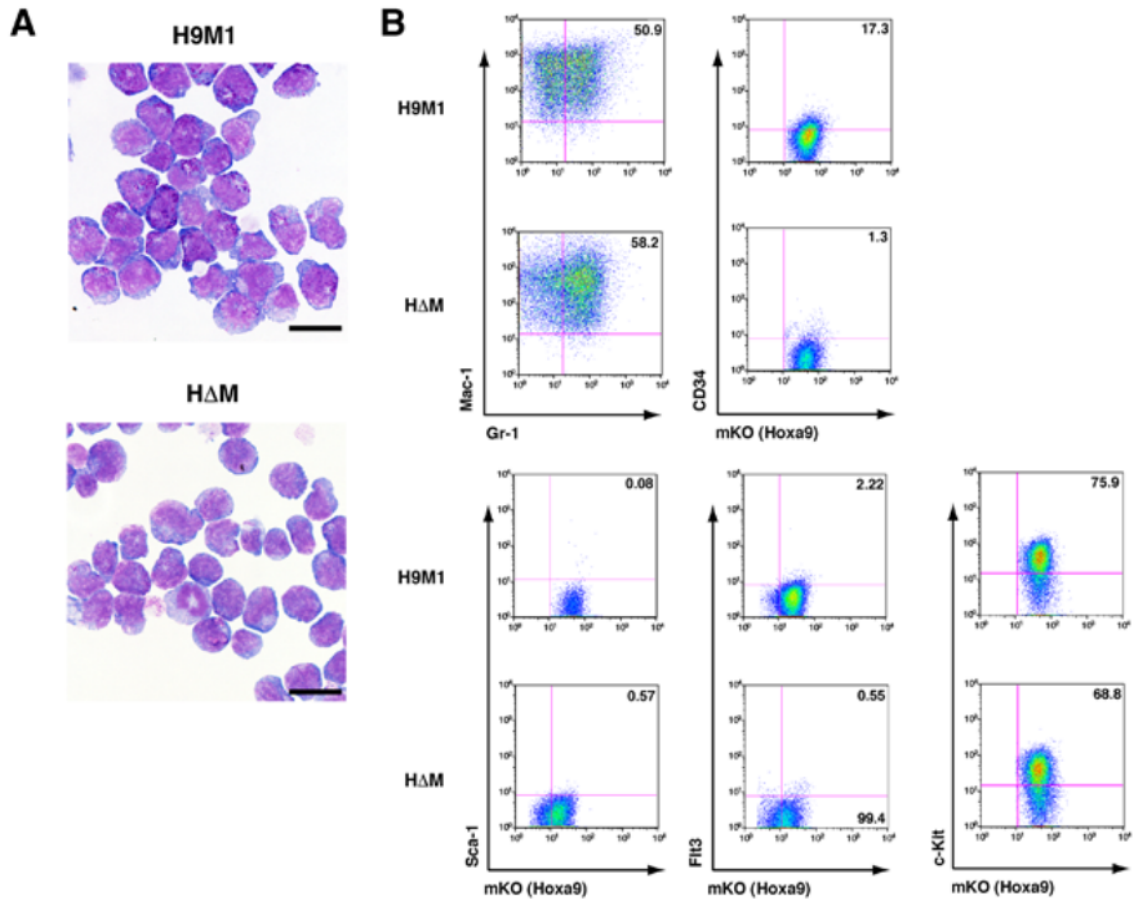

**Supplemental Figure 1.** Characterization of H9M1 cells and the effect of *Meis1* knockout. (A) Giemsa staining of H9M1 and H $\Delta$ M cells. Scale bar: 20  $\mu$ m. (B) Surface marker expression observed in H9M1 and H $\Delta$ M cells. *Meis1* KO induced a mild increase of Gr-1-positive, Sca-1 positive fractions and a decrease of the CD34-positive fraction. Data are representative of 2 independent experiments.

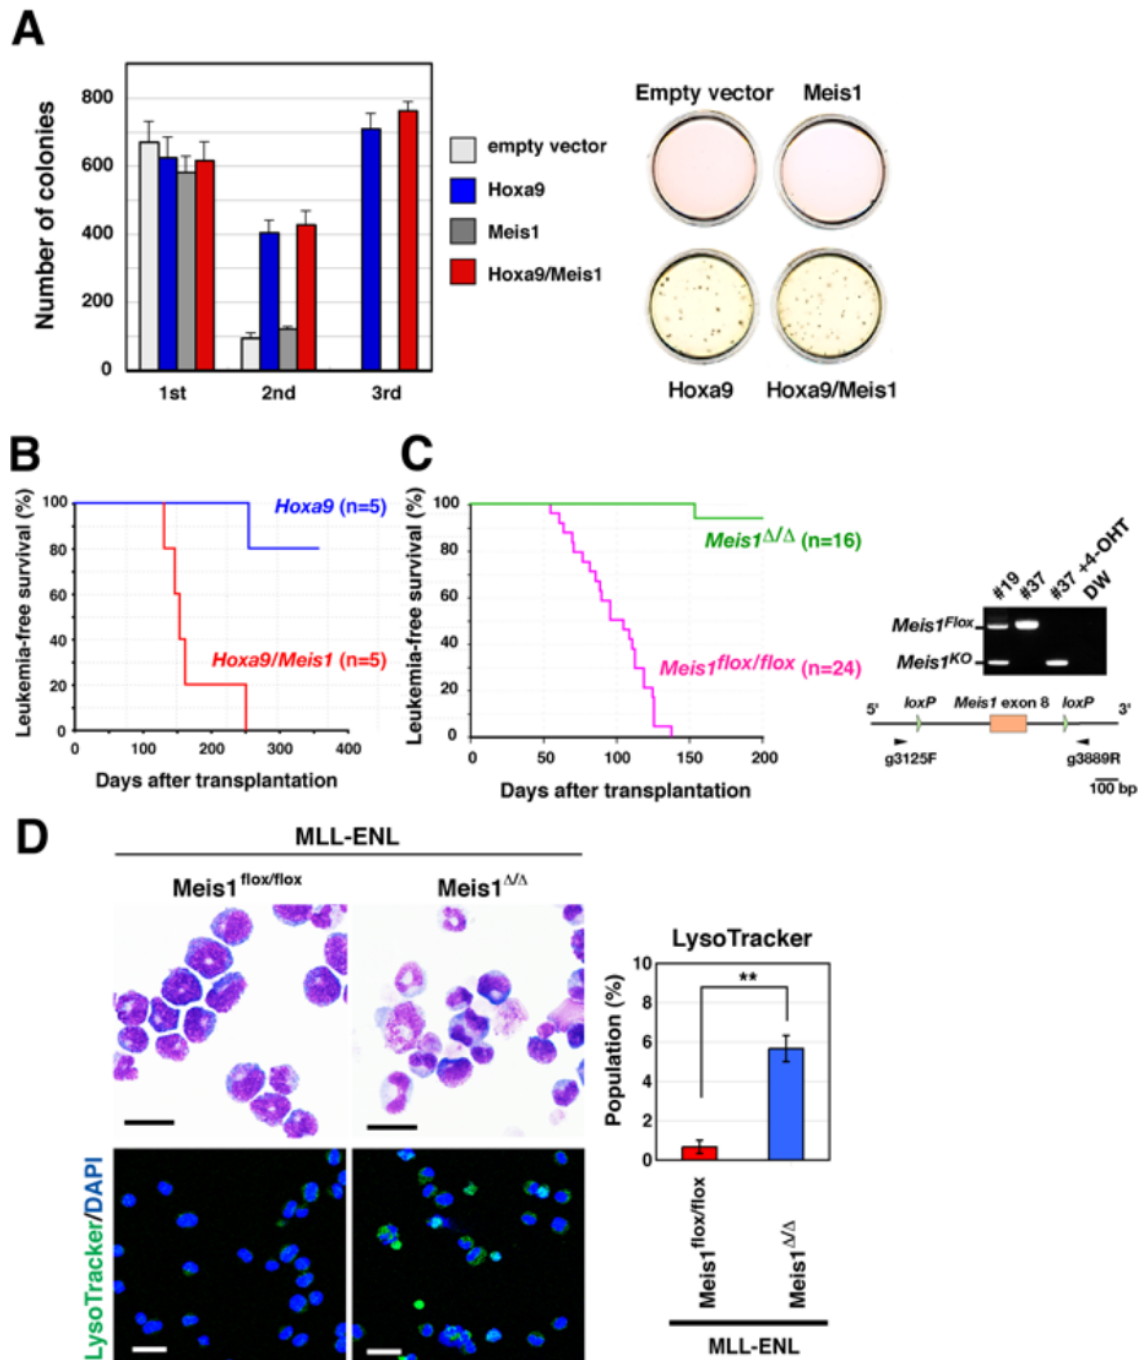

**Supplemental Figure 2.** *Meis1* functions in leukemogenesis, leukemic cell homing and engraftment. (A) Replating assays using primary murine bone marrow cells infected with indicated retroviruses. The colony numbers in methylcellulose culture during three serial replating experiments were measured. Data represent means  $\pm$  SEM from 3 independent experiments (left) and representative cultures at the third replating (right) are shown. (B) Leukemia-free survival of lethally irradiated recipient mice transplanted with bone marrow cells transduced with *Hoxa9* and *Meis1*, or with *Hoxa9* only. (C) Leukemia-free survival of lethally irradiated recipient mice transplanted with bone marrow cells transduced with the *MLL-ENL* retrovirus. *Meis1* KO was achieved by post-transplantation tamoxifen

administration for two weeks twice at five-day intervals (top). One of sixteen mice administered tamoxifen developed AML due to heterozygous preservation of *Meis1* through an acquired mutation of the *loxP* site. Genomic PCR of the *Meis1* locus in *MLL-ENL*-induced AML using bone marrow cells derived from *Meis1* conditional knockout mice (left). *Meis1*<sup>flox/flox</sup> (#37), *Meis1*<sup>ko/flox</sup> (#19) and *Meis1*<sup>ko/ko</sup> (#37 with 4-OHT treatment). The map and the position of primers (g3125F: 5'-GCATCTTCTTACCAGTTGACG-3' and g3889R: 5'-CACATGGACTCCCGAGCC-3') of the *Meis1* flox allele are shown (bottom). (D) Differentiation of *MLL-ENL*-induced AML cells by *Meis1* knockout was demonstrated by the increased frequency of granulocytes (top, Giemsa staining) or increased content of lysosomes (bottom, LysoTracker staining). Representative pictures of 3 independent experiments. Scale bar: 20  $\mu$ m. Quantification of LysoTracker-positive cells is indicated (right). Data are mean  $\pm$  SEM from 3 independent experiments (\*\*,  $P < 0.01$  by 2-tailed Student's *t* test).

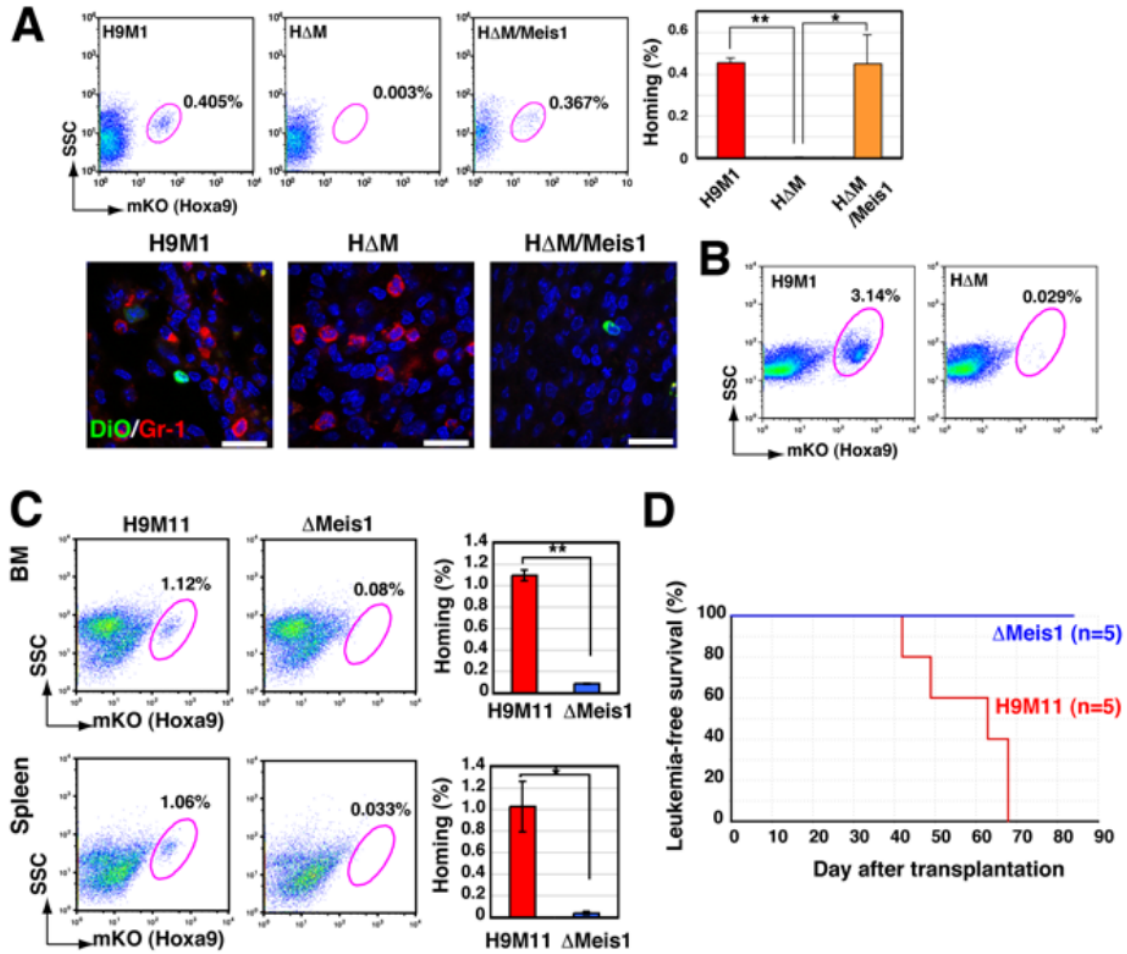

**Supplemental Figure 3.** Meis1 functions in leukemogenesis and leukemic cell homing. (A) H9M1 cells in the spleen 48 hours after transplantation were detected as an mKO-positive fraction by flow cytometry. Representative data of 3 independent experiments (top left). A significant reduction of H9M1 cells in the spleen was observed in animals transplanted with *Meis1* knockout cells. The frequency was restored by re-introduction of *Meis1*. Frequencies of mKO-positive cells in the spleen are indicated as the means  $\pm$  SEM of 3 independent experiments (\*,  $P < 0.05$ , \*\*,  $P < 0.01$  by 1-way ANOVA with Dunnett's multiple comparison test) (top right). DiO-stained H9M1 cells were detected in frozen sections of the spleen (bottom), absent in *Meis1* knockouts (center) and were observed after *Meis1* re-introduction into H $\Delta$ M (right). Gr-1 is indicated by red fluoro-dye and nuclei were counterstained with DAPI. Representative pictures of 3 independent experiments. Scale bar: 20  $\mu$ m. (B) H9M1 cells in the spleen two weeks after transplantation were detected as in (A). (C) H9M11 cells in bone marrow (top) or the spleen (bottom) 48 hours after transplantation were detected as an mKO-positive fraction by flow cytometry. Representative data of 3 independent experiments (left). A significant reduction of H9M11 cells was observed after transplantation of *Meis1* knockout cells. Frequencies of mKO-positive cells in spleen are indicated as the means  $\pm$  SEM from 3 independent experiments (\*,  $P < 0.05$ , \*\*,  $P < 0.01$  by 2-tailed Student's  $t$  test) (right). (D) Survival curve of the mice transplanted with H9M11 cells with or without *Meis1* knockout.

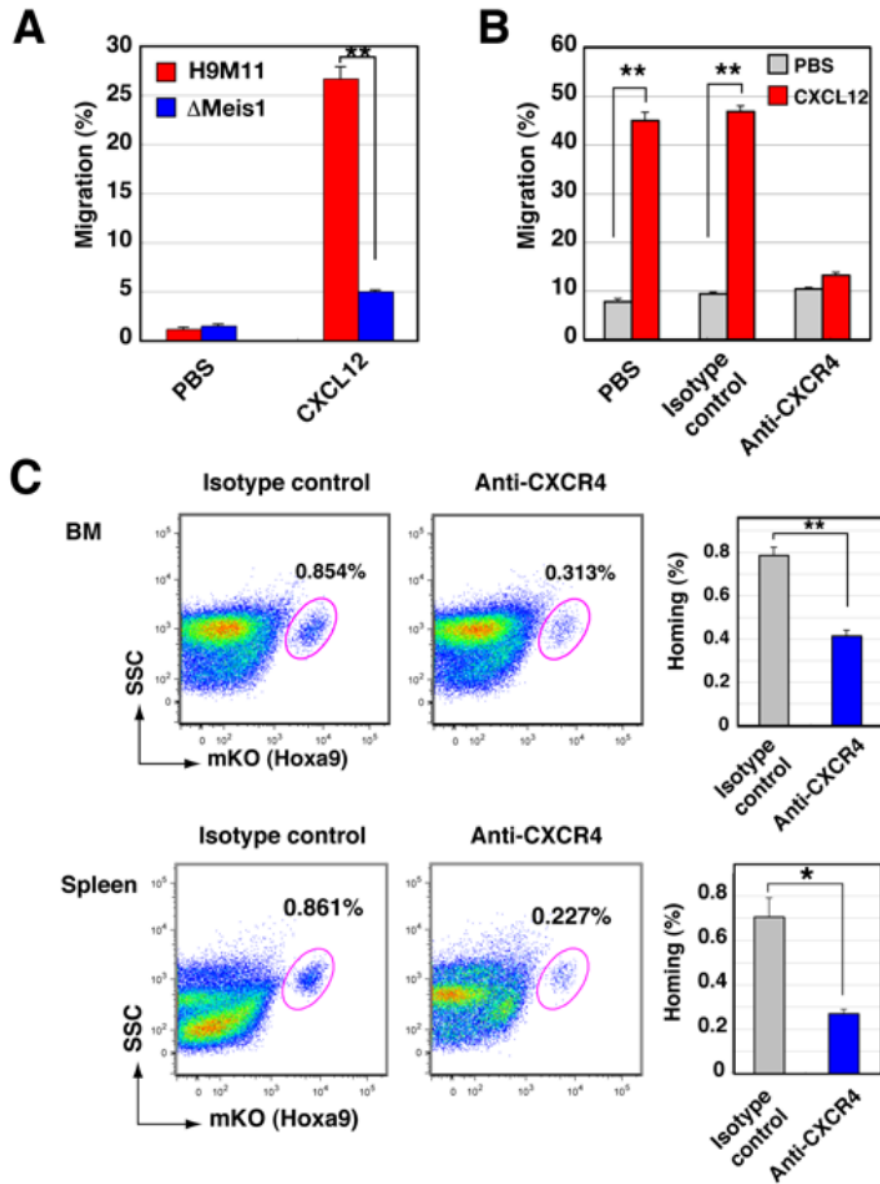

**Supplemental Figure 4.** Association of the CXCL12-induced cell migratory activity with Meis1. (A) Cell migration assay of the H9M11 cell line. CXCL12 significantly enhanced cell migration of H9M11 cells but not in Meis1-deleted H9M11. Results represent mean frequencies of migratory cells/ $5 \times 10^5$  cells  $\pm$  SEM ( $n = 3$ , \*\*,  $P < 0.01$  by 2-tailed Student's  $t$  test). (B) Suppression of cell migration by an anti-CXCR4 antibody. H9M1 cells were treated with an anti-CXCR4 or an isotype control antibody in the presence or absence of CXCL12, and the frequencies of cell migration are indicated ( $n = 3$ , \*\*,  $P < 0.01$  by 2-tailed Student's  $t$  test). (C) Inhibition of cell homing by anti-CXCR4. H9M1 cells in bone marrow 48 hours after transplantation was detected by flow cytometry and gating on the mKO-positive fraction. A significant reduction of H9M1 cells in bone marrow (top) and spleen (bottom) was observed as a result of anti-CXCR4 treatment. Representative data of 3 independent experiments. Frequencies of mKO-positive cells in bone marrow and the spleen are indicated as the means  $\pm$  SEM of 3 independent experiments (\*,  $P < 0.05$ , \*\*,  $P < 0.01$  by 2-tailed Student's  $t$  test) (right).

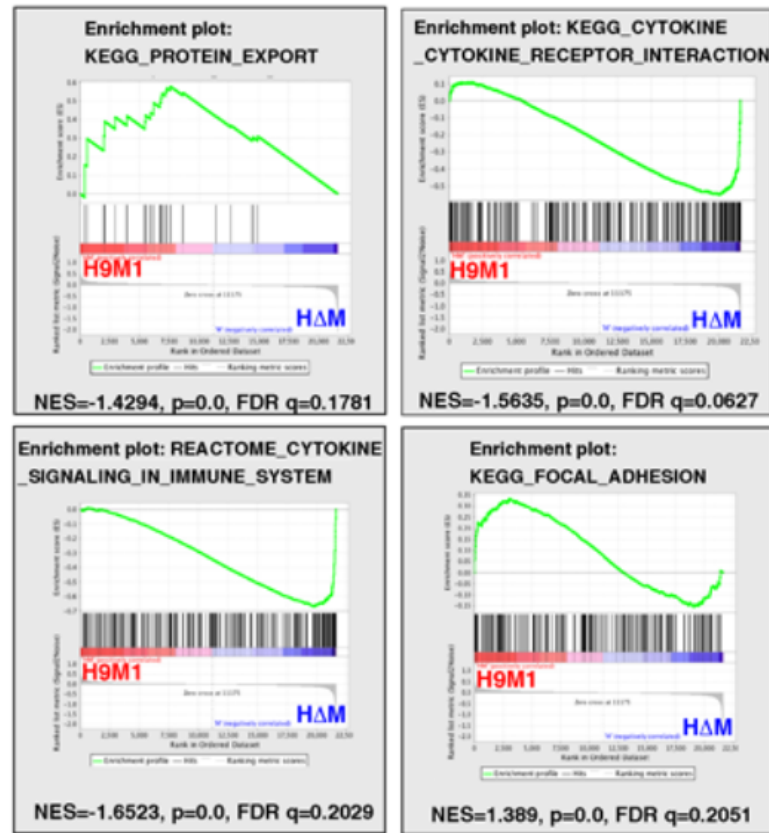

**Supplemental Figure 5.** The data sets of gene expression differences resulting from *Meis1* knockout were used for GSEA. Enrichment plots are shown for selected sets identified by GSEA. Normalized enrichment scores (NES), nominal *p*-values and FDR *q*-values are indicated.

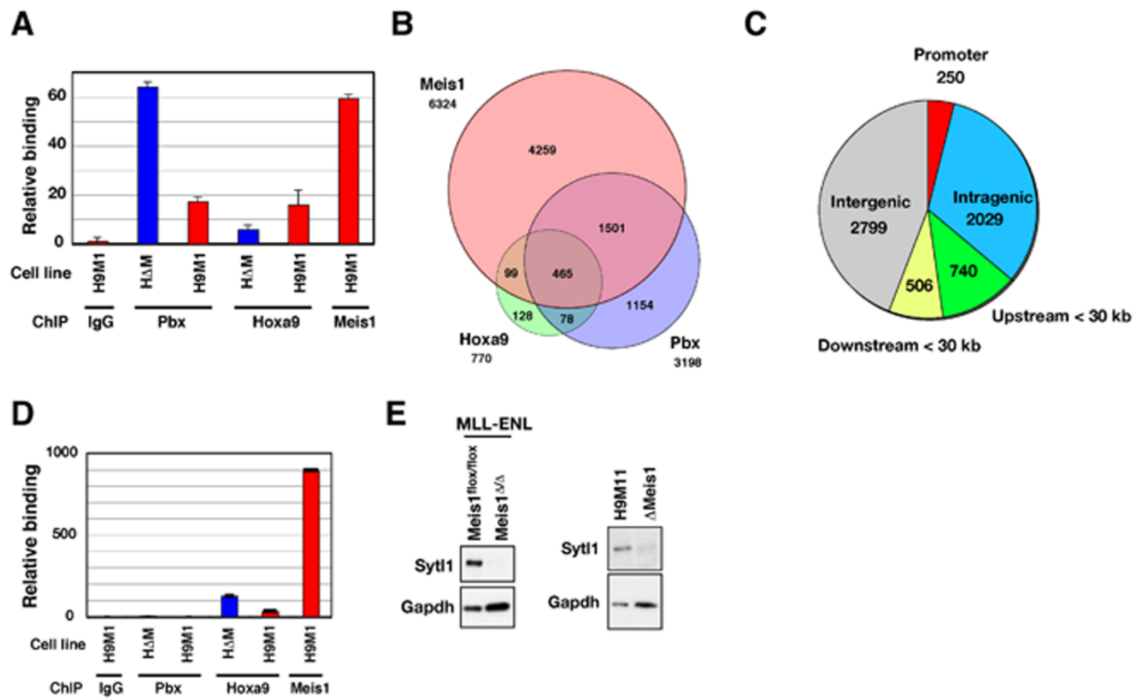

**Supplemental Figure 6.** ChIP-seq identified *Syt11* as a transcriptional target of Meis1. (A) Chromatin immunoprecipitation of Meis1 was validated by quantitative PCR of the *Maf* locus. Immunoprecipitated DNA samples using indicated antibodies were amplified using *Maf* forward (5'- TGGCTGCGCCCCAGTAGC-3') and reverse (5'- GAGAGCGGCAGCGATTAGC-3') primers. Data are presented as the means  $\pm$  SEM of 3 independent experiments. (B) Venn diagrams for Meis1, PBX and Hoxa9 binding sites in the whole genome. (C) Distribution of 6,324 Meis1-binding peaks in relation to known genes. Meis1 binding regions were divided into indicated categories. Promoter regions indicate < one kb from the transcription start site, and intergenic regions indicate > 30 kb from genes nearby. (D) Quantitative ChIP PCR for Meis1-binding at the *Syt11* locus. Data are presented as the means  $\pm$  SEM of 3 independent experiments. (E) Decreased *Syt11* protein expression in *MLL-ENL*-induced AML cells (left) and H9M11 cells (right) by *Meis1* KO, shown by immunoblotting using  $\alpha$ -*Syt11*; blots are representative of 2 independent experiments.

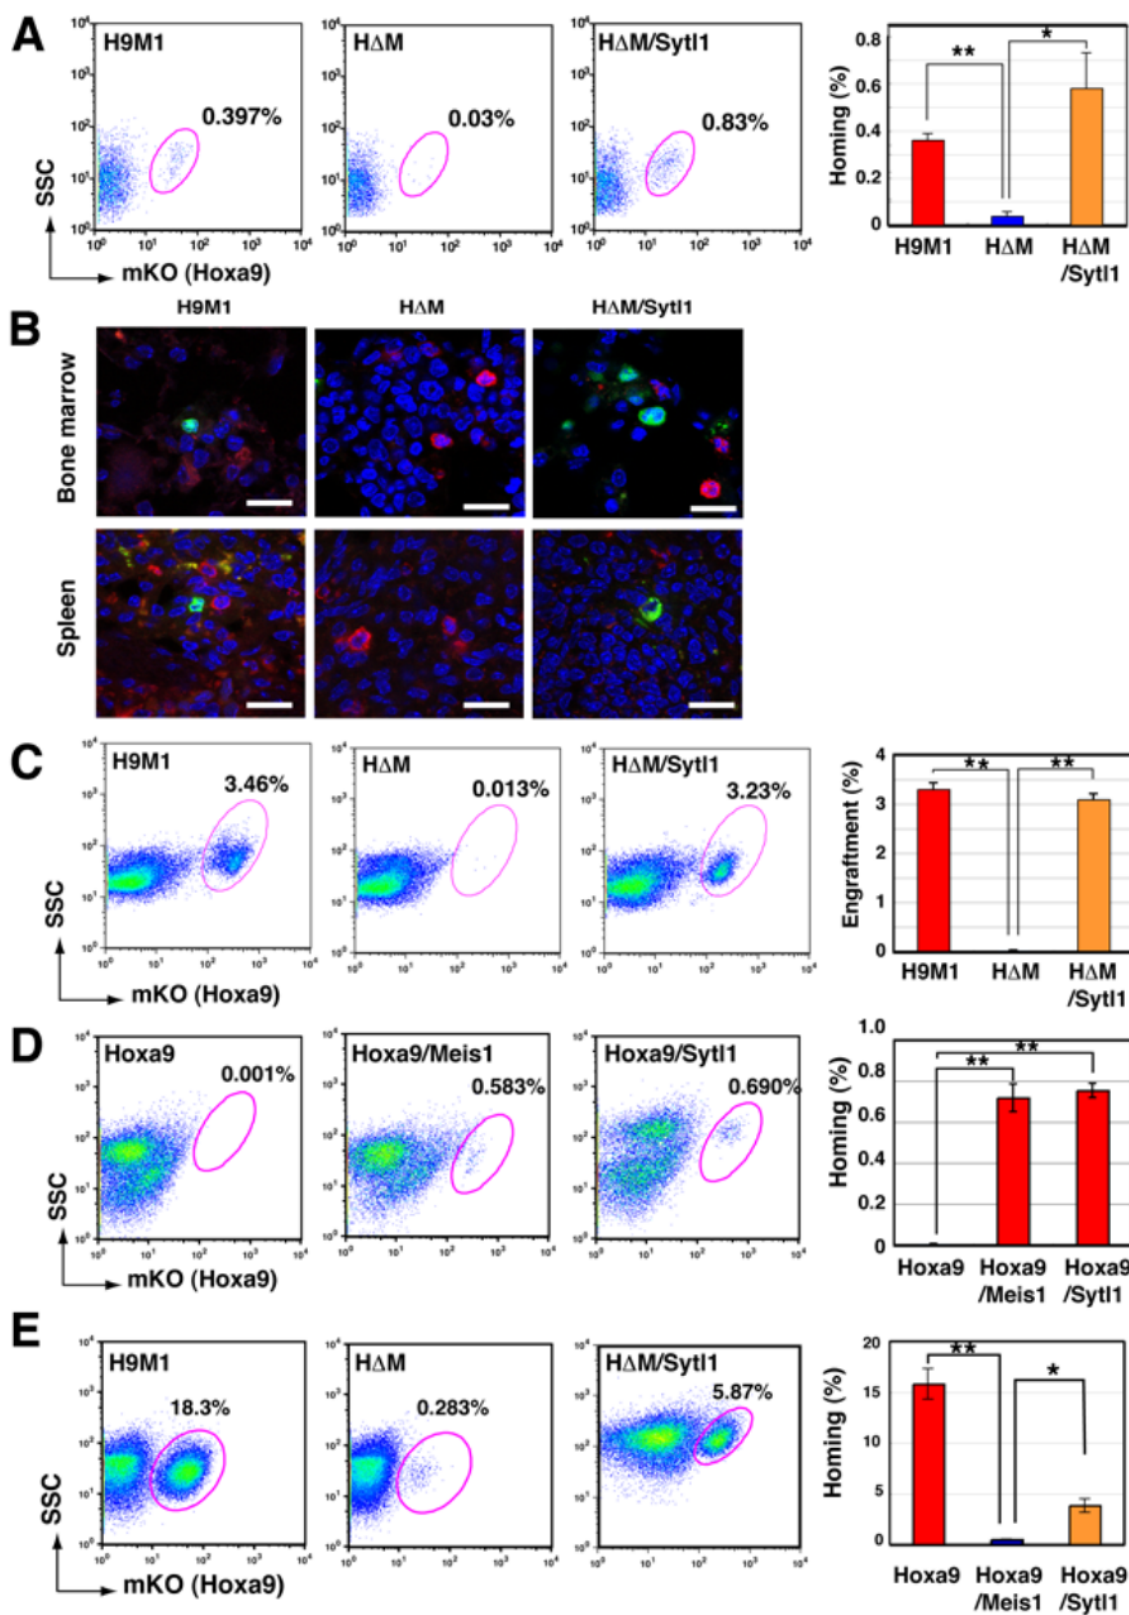

**Supplemental Figure 7.** Sytl1 promotes leukemic cell homing and engraftment. (A) *Sytl1* was retrovirally introduced into HΔM cells. Forty-eight hours after transplantation of the indicated cells, spleen samples were analyzed for

mKO-positive fractions by representative flow cytometry (3 experiments) (left). Frequencies of mKO-positive cells in the spleen are indicated as the means  $\pm$  SEM from 3 independent experiments (\*,  $P < 0.05$ ; \*\*,  $P < 0.01$  by 1-way ANOVA with Dunnett's multiple comparison test) (right). (B) DiO-stained H9M1, H $\Delta$ M and H $\Delta$ M transfected with Sytl1 cells were detected in frozen sections of bone marrow (top panels) and spleen (bottom panels). Gr-1 is indicated by red fluoro-dye and nuclei were counterstained with DAPI. Representative pictures of 3 independent experiments. Scale bar: 20  $\mu$ m. (C) Representative flow cytometric analysis as in (A) was performed two weeks after transplantation (3 experiments) (left). Frequencies of mKO-positive cells in bone marrow are indicated as the means  $\pm$  SEM ( $n = 3$ , \*\*,  $P < 0.01$  by 1-way ANOVA with Dunnett's multiple comparison test) (right). (D) Homing of *Hoxa9*-transformed wild-type bone marrow cells was enhanced by both *Meis1* and *Sytl1*. Representative flow cytometry of 3 independent experiments (left). Frequencies of mKO-positive cells in bone marrow were measured 48 hours after transplantation and indicated as the means  $\pm$  SEM ( $n = 3$ , \*\*,  $P < 0.01$  by 1-way ANOVA with Dunnett's multiple comparison test) (right). (E) Homing of H9M1, H $\Delta$ M and H $\Delta$ M/Sytl1 cells by intra-femoral injection. Forty-eight hours after transplantation of the indicated cells, spleen samples were analyzed for mKO-positive fractions by representative flow cytometry (5 experiments) (left). Frequencies of mKO-positive cells in the spleen are shown as the means  $\pm$  SEM from 5 independent experiments (\*,  $P < 0.05$ , \*\*,  $P < 0.01$  by 1-way ANOVA with Dunnett's multiple comparison test) (right).

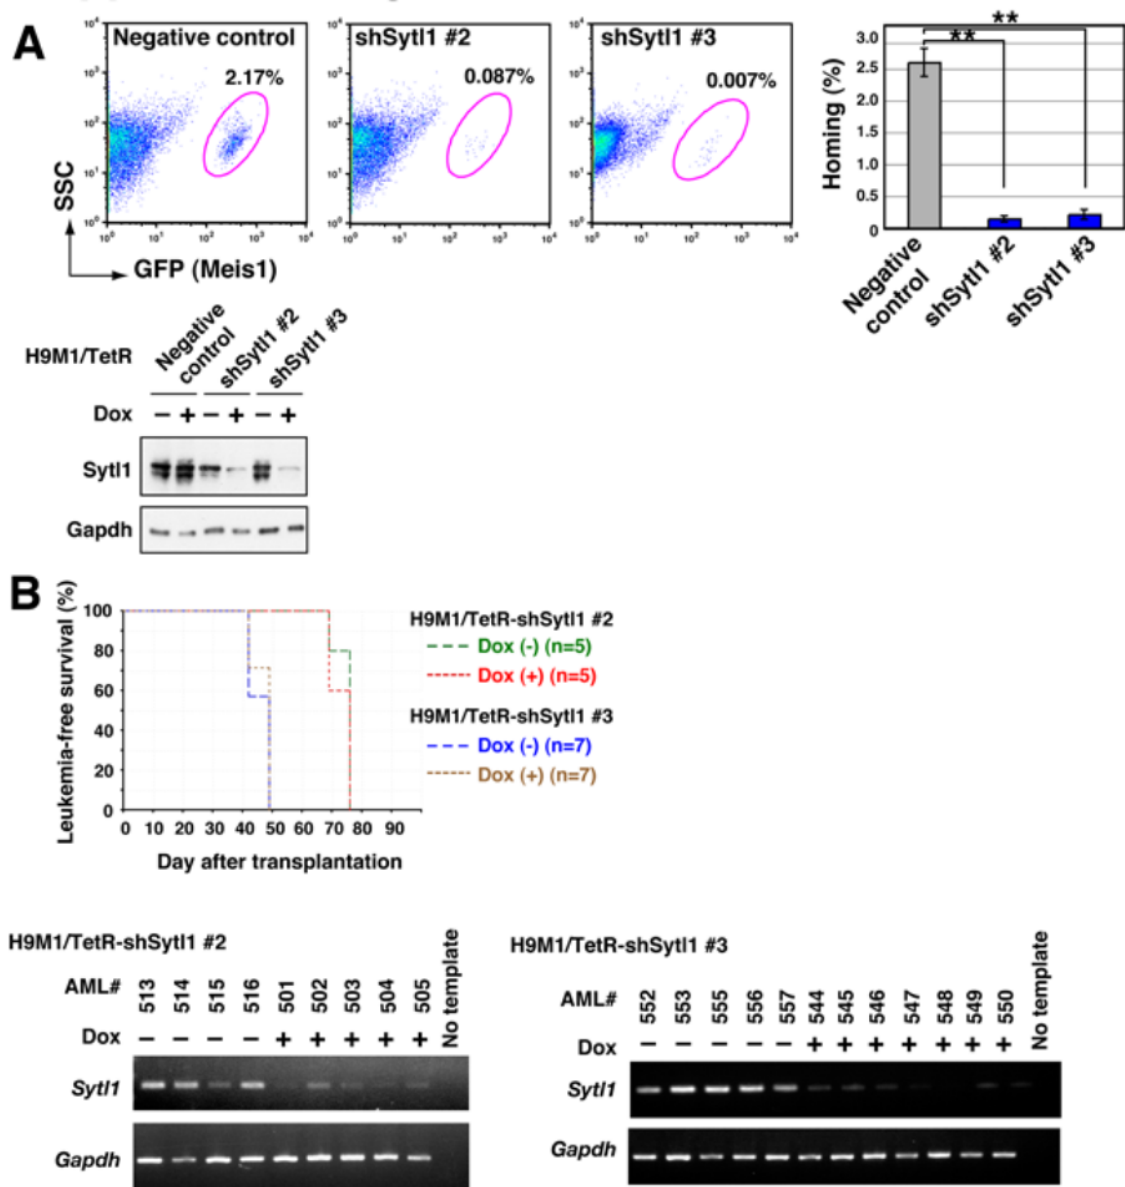

**Supplemental Figure 8.** Doxycycline-inducible *Syt11* knockdown in H9M1 cells. (A) Homing of leukemia cells to bone marrow was suppressed by inducible *Syt11* knockdown. Representative of 3 experiments (top left). Frequencies of GFP-positive cells in bone marrow are measured 48 hours after transplantation and indicated as the means  $\pm$  SEM ( $n = 3$ , \*\*,  $P < 0.01$  by 1-way ANOVA with Dunnett's multiple comparison test) (top right). Knockdown of *Syt11* was confirmed by Western blotting; blots are representative of 2 experiments (bottom). (B) Doxycycline-inducible *Syt11* knockdown did not suppress leukemia development. Kaplan-Meier survival curves are shown in shSyt11 #2 and #3 cohorts with or without doxycycline administration (top). *Syt11* knockdown was confirmed in leukemic cells sorted from peripheral blood of leukemic mice by RT-PCR. Representative of 2 experiments (bottom).

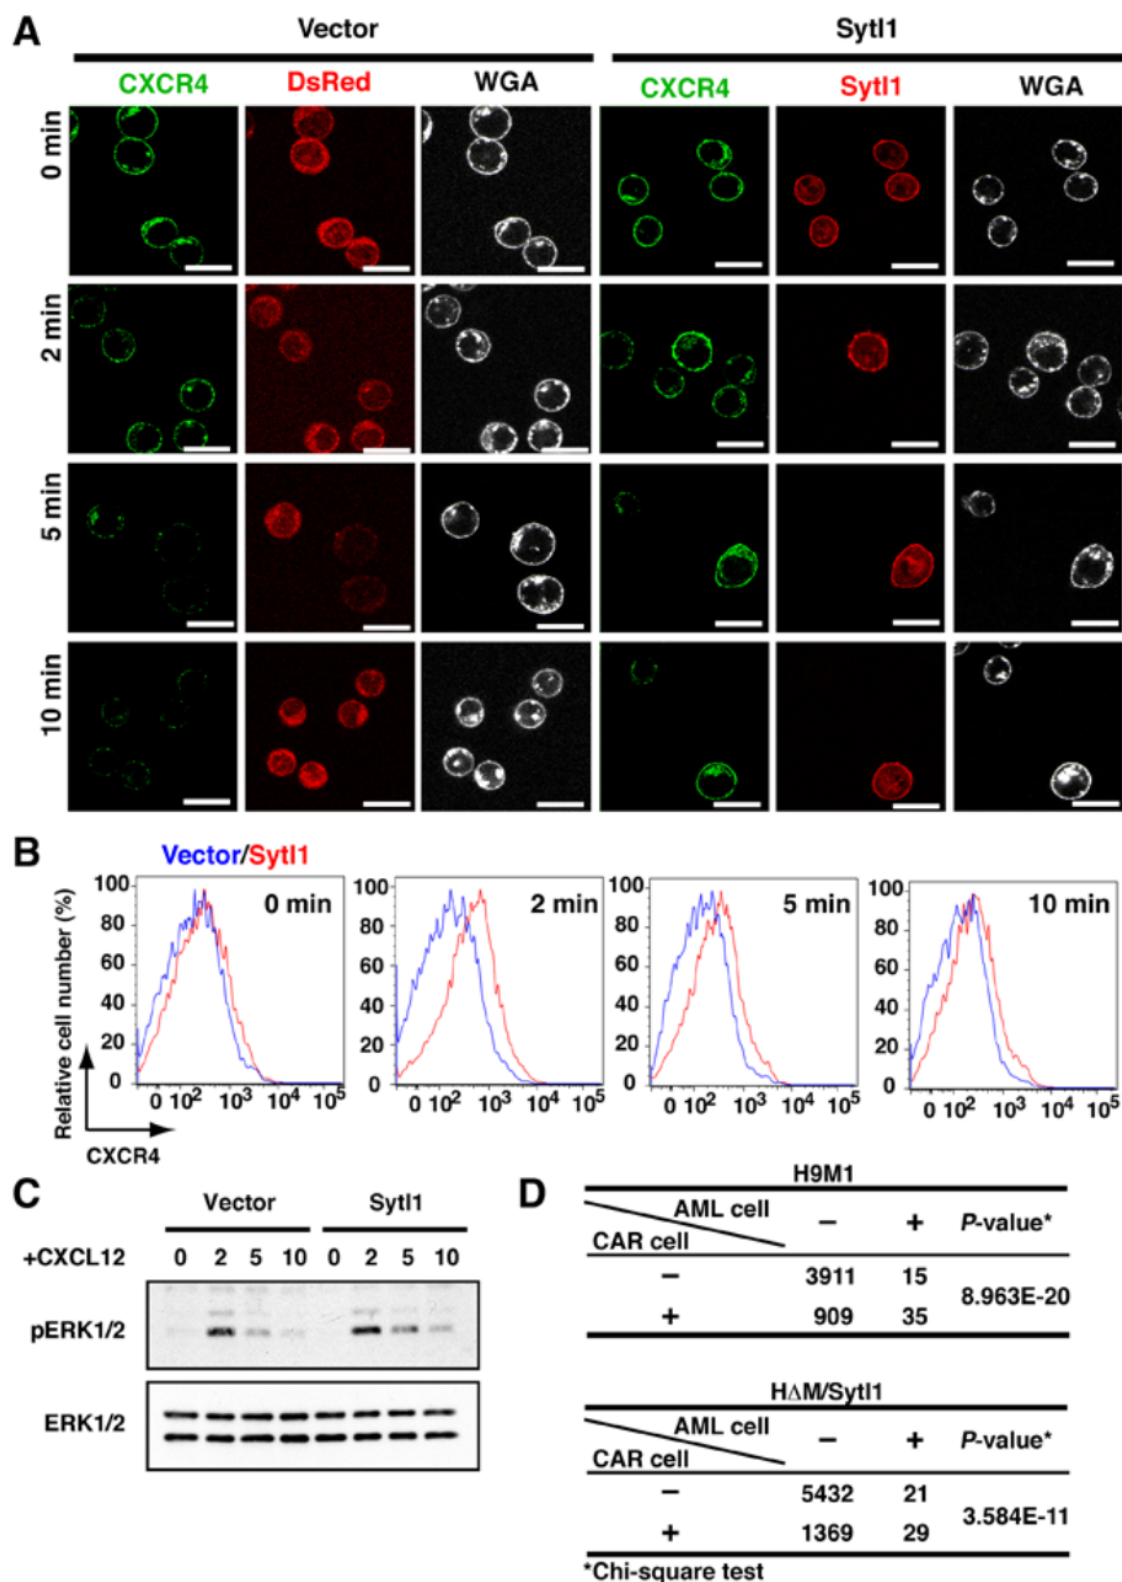

**Supplemental Figure 9.** Sytl1 promotes membrane trafficking of CXCR4 and activates downstream signaling. (A) Membrane localization of CXCR4 in 32Dcl3 cells was analyzed by immunofluorescence. Sytl1 expression was visualized as a DsRed-Sytl1 fusion protein. Alexa Fluor 350-conjugated wheat germ agglutinin (WGA) was used to detect plasma membrane. Representative pictures of 3

independent experiments. Scale bar: 20  $\mu\text{m}$ . (B) Representative flow cytometric analysis of 32Dcl3 cells transfected with *Syt11* (red) or empty vector (blue) (3 experiments). CXCR4 on the cellular surface was detected with an anti-CXCR4 antibody and flow cytometric analysis at the indicated time after CXCL12 stimulation. (C) ERK phosphorylation after CXCL12 stimulation in 32Dcl3 cells. Minutes after CXCL12 stimulation are indicated; blots are representative of 3 experiments. (D) Statistical evaluation of juxtaposition of CAR cells and AML cells. Confocal images of bone marrow frozen sections were obtained and the numbers of both CAR, H9M1 or HAM/Syt11 cells per 225  $\mu\text{m}^2$  in bone marrow were counted. CAR cells and AML cells on the same 225  $\mu\text{m}^2$  grid were judged as positive. The relationship between CAR cells and H9M1 cells, and CAR cells and HAM/Syt11 cells was significant by Chi-square test. *P* values are shown.

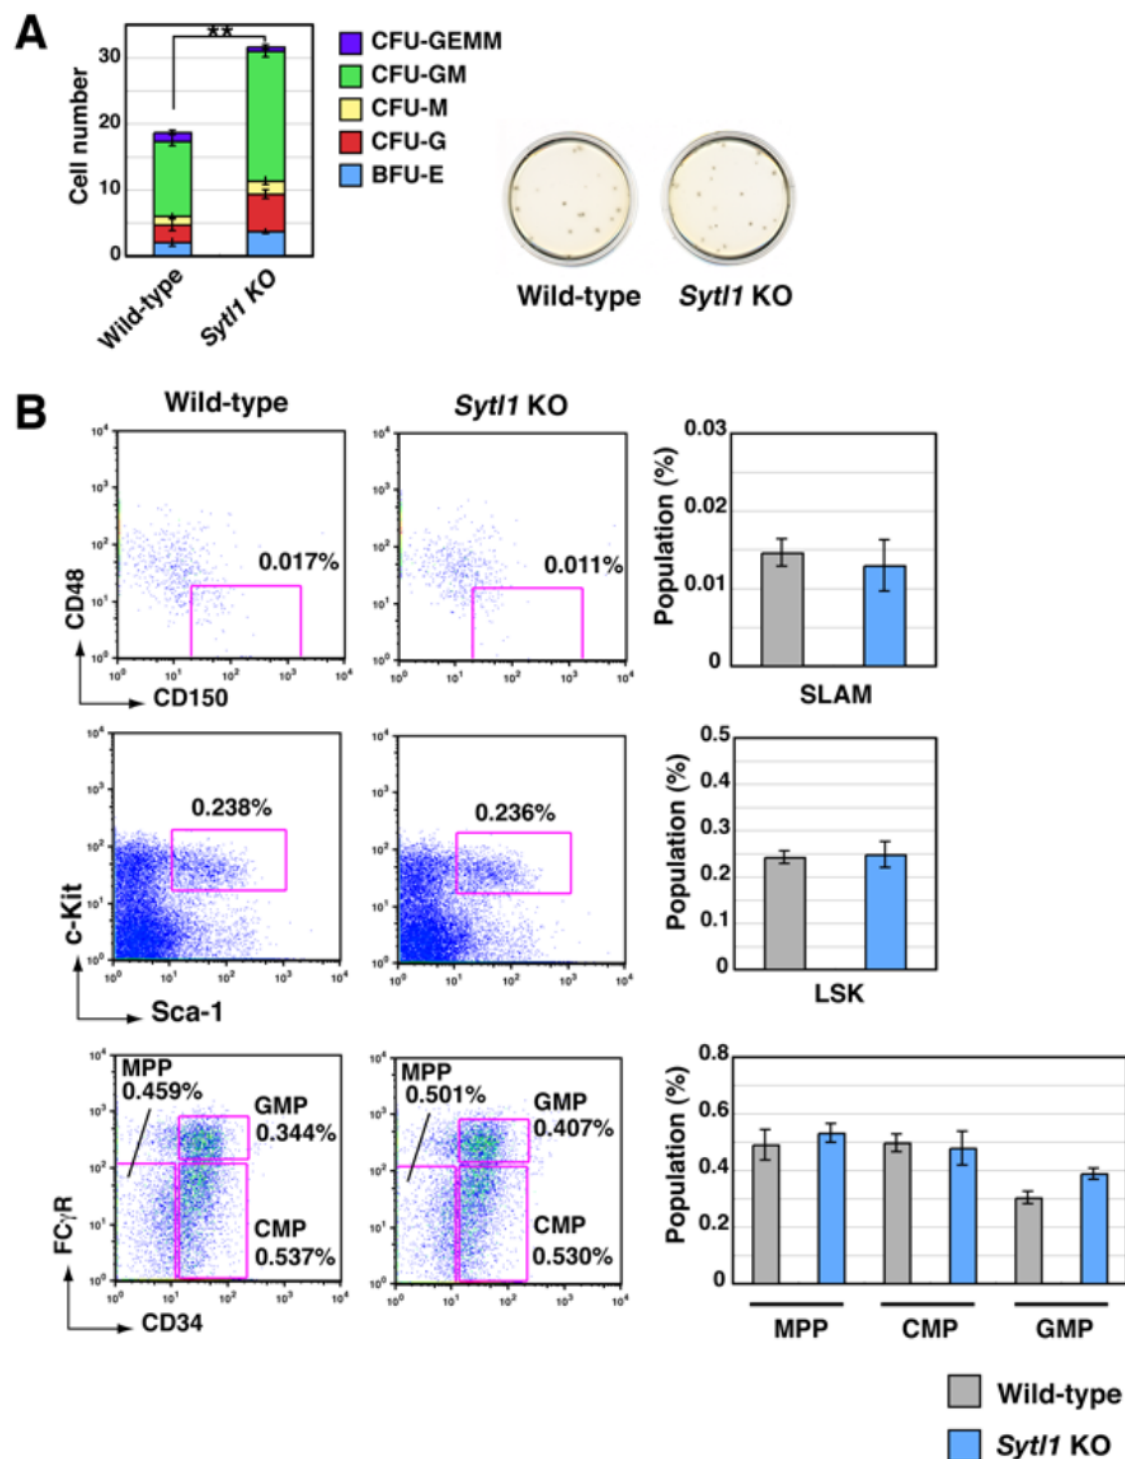

**Supplemental Figure 10.** Hematopoiesis of *Sytl1* KO mouse bone marrow. (A) Colony forming assay showed mild but significant increase of colony formation in *Sytl1* KO bone marrow ( $n = 3$ , \*\*,  $P < 0.01$  by 2-tailed Student's  $t$  test) (left). Representative figures for colony formation are shown (3 experiments) (right). (B) Compositions of SLAM cells (CD34<sup>-</sup> and CD48-negative and CD150-positive LSK cells) (top) and LSK cells (middle) and myeloid progenitors (bottom) are exhibited. Representative of 3 independent experiments.

## **Supplemental Video Legends**

**Supplemental Video 1.** Motility of 32Dcl3 cells during CXCL12 stimulation. 32Dcl3 cells ( $2 \times 10^4$ ) transfected with an expression vector bearing the Cxcr4-GFP fusion gene were cultured on 35-mm glass-based dishes coated with 2  $\mu\text{g/mL}$  recombinant mouse VCAM-1/CD106 Fc chimera with growth medium. After 24 hours cultivation,  $2 \times 10^4$  CXCL12-coated beads were added to the dishes. After addition of CXCL12-coated beads, GFP images were obtained in a 5%  $\text{CO}_2$  humidified atmosphere at  $37^\circ\text{C}$ . Time-lapse images were taken at 30 seconds intervals over 30 minutes using an EMCCD camera. Movie is representative of 40 cells in 3 independent experiments.

**Supplemental Video 2.** Motility of 32Dcl3 cells expressing Sytl1 on CXCL12 stimulation. 32Dcl3 cells ( $2 \times 10^4$ ) transfected with expression vectors bearing the Cxcr4-GFP or Sytl1-DsRed fusion genes were cultured on 35-mm glass based dishes coated with 2  $\mu\text{g/mL}$  recombinant mouse VCAM-1/CD106 Fc chimera with growth medium. After 24 h cultivation,  $2 \times 10^4$  CXCL12-coated beads were added to the dishes. After addition of CXCL12-coated beads, GFP and DsRed images were obtained in a 5%  $\text{CO}_2$  humidified atmosphere at  $37^\circ\text{C}$ . Time-lapse images were taken at 30 seconds intervals over 30 minutes using an EMCCD camera. Movie is representative of 40 cells in 3 independent experiments.

**Supplemental Table 5. Primer sequences**

| <b>Genes</b>               | <b>Primers</b>  | <b>Sequences</b>                 |
|----------------------------|-----------------|----------------------------------|
| <i>Cxcl12</i>              | Forward primer  | 5'-GAGCCAACGTCAAGCATCTG-3'       |
|                            | Reverse primer  | 5'-GGGTCAATGCACACTTGTC-3'        |
| <i>Gapdh</i>               | Forward primer  | 5'-TGTCGTGGAGTCTACTGGTGTCTTC-3'  |
|                            | Reverse primer  | 5'-GGAGATGATGACCCTTTTGGCTC-3'    |
| <i>Sytl1</i>               | Forward primer  | 5'-TCTGATGTCCTCAAACGAGATGC-3'    |
|                            | Reverse primer  | 5'-ACCAAAATGGGCGTGATGG-3'        |
| <i>Sytl1</i><br>(promoter) | Forward primer  | 5'-CAAGTGCTGGGATTTAGAGG-3'       |
|                            | Reverse primer  | 5'-GTCATACCTGCAACCGTGGC-3'       |
| <i>Meis1</i>               | Forward primer1 | 5'-GCATCTTCTTACCAGTTGACG-3'      |
|                            | Forward primer2 | 5'-GACGATGATGACCCTGATAAG-3'      |
|                            | Reverse primer  | 5'-CACATGGACTCCCGAGCC-3'         |
| <i>D3Mit159</i>            | Forward primer  | 5'-CTAACCCAGATAGGGCTTTGG-3'      |
|                            | Reverse primer  | 5'-AGATTACCCTCTGGTGTTTACATACA-3' |
| <i>c-Maf</i>               | Forward primer  | 5'- TGGCTGCGCCCCAGTAGC-3'        |
|                            | Reverse primer  | 5'-GAGAGCGGCAGCGATTAGC-3'        |
